# Supplementary material for: Enhancing the ORR activity of fullerene-derived carbons by implanting Fe in assembled diamine–C60 spheres
Source: Royal Society of Chemistry journal article supplement (doi:10.1039/d2ce00737a), 2022-01-01
Supplement: d2ce00737a1.pdf [file d2ce00737a1.pdf]

## *Supporting information*

### **Enhancing ORR Activity of Fullerene-Derived Carbons by Implanting Fe in Assembled Diamine-C<sub>60</sub> Spheres**

*Bohong Jiang,<sup>a#</sup> Suwei Wang,<sup>b#</sup> Fancang Meng,<sup>a</sup> Li Ju,<sup>a</sup> Wei Jiang,<sup>b\*</sup> Qingmin Ji,<sup>a\*</sup>*

*Heng-Dao Quan<sup>c</sup>*

<sup>1</sup> Herbert Gleiter Institute for Nanoscience, School of Materials Science and Engineering, Nanjing University of Science & Technology, 200 Xiaolingwei, Nanjing, 210094, China

<sup>2</sup> National Special Superfine Powder Engineering Technology Research Center, Nanjing University of Science and Technology, 200 Xiaolingwei, Nanjing, 210094, China

<sup>3</sup> School of Chemistry and Chemical Engineering, Beijing Institute of Technology, 5 South Zhongguancun Street, Beijing 1000081, China

# These authors contributed this work equally

\*Corresponding author: [jiqingmin@njust.edu.cn](mailto:jiqingmin@njust.edu.cn), [superfine\\_jw@126.com](mailto:superfine_jw@126.com)

## Additional Data

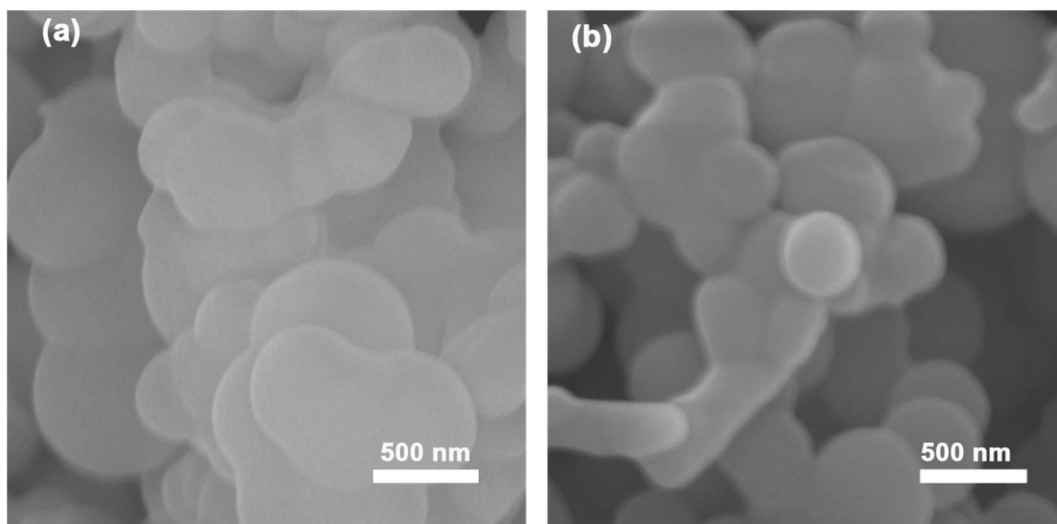

**Fig. S1.** SEM images of fullerene assembly structures at various mixing ratios of  $C_{60}$  and EDA, (a)  $C_{60}$ : EDA = 1:100, (b)  $C_{60}$ : EDA = 1:5000.

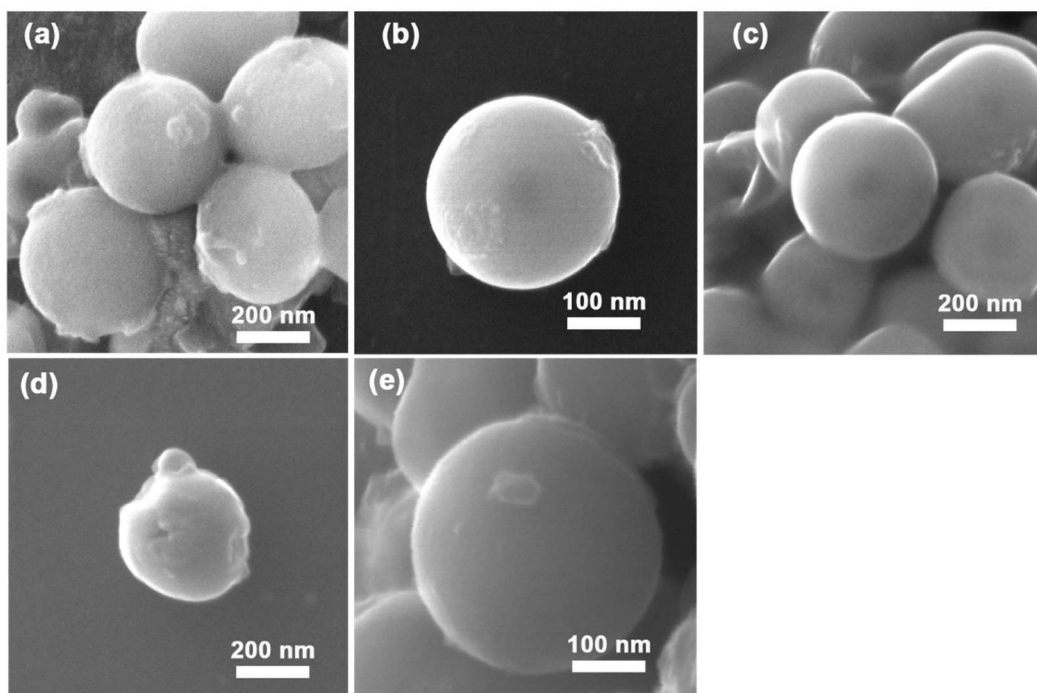

**Fig. S2.** SEM images of (a) N@FCS-500, (b) N@FCS-700, (c) N@FCS-900, (d) FeN@FCS-500 and (e) FeN@FCS-700.

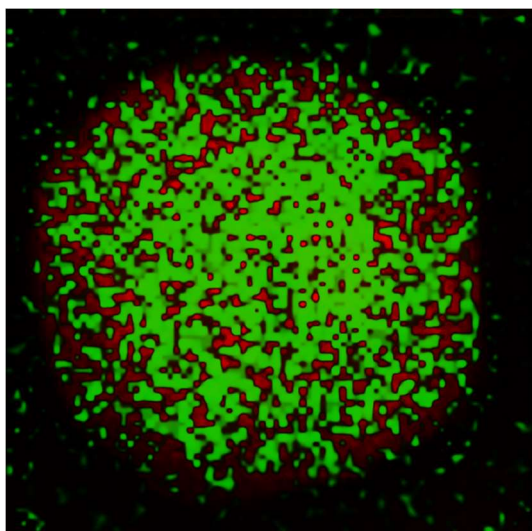

**Fig. S3.** The image of mixed elemental mappings of FeN@FCS-900 based on STEM observation and EDS analysis.

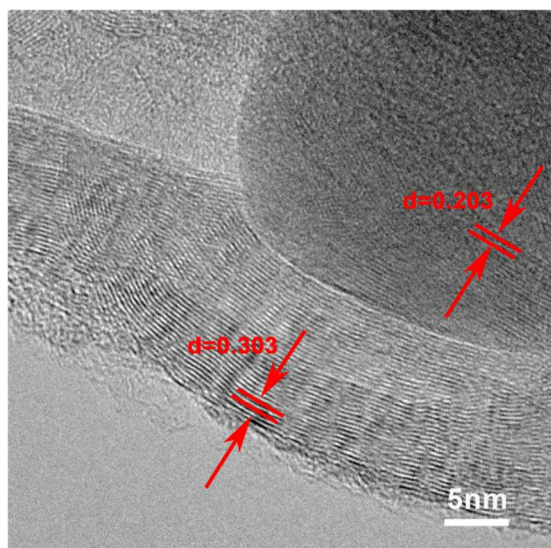

**Fig. S4.** HR-TEM image of FeN@FCS-900.

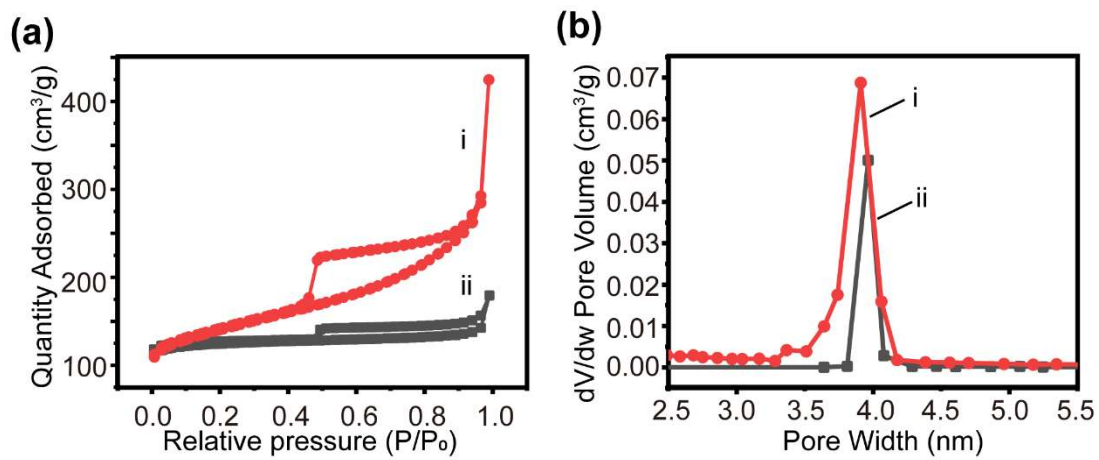

**Fig. S5.** (a) Nitrogen isotherms and (b) pore size distributions of (i) FeN@FCS-900 and (ii) N@FCS-900.

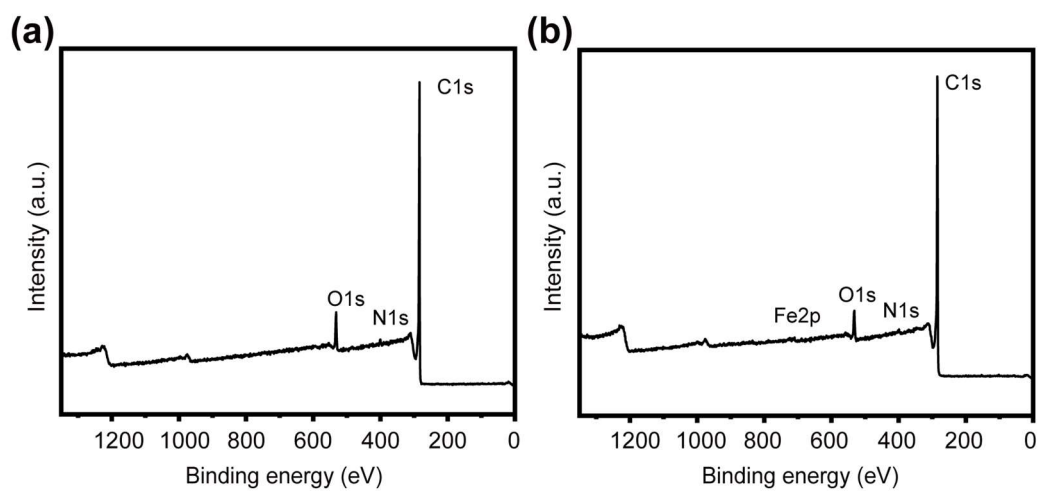

**Fig. S6.** Full-scan XPS spectra of (a) N@FCS-900 and (b) FeN@FCS-900.

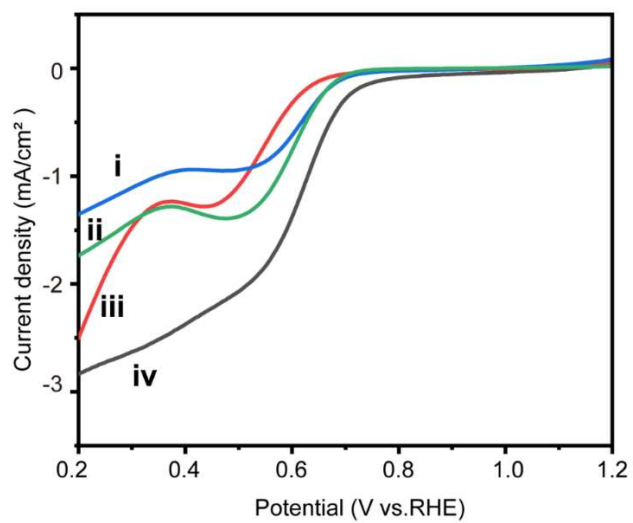

**Fig. S7.** LSV curves of (i) N@FCS-500, (ii) N@FCS-700, (iii) FeN@FCS-500 and (iv) FeN@FCS-700 in O<sub>2</sub>-saturated 0.1 M KOH solution at 1600 rpm.



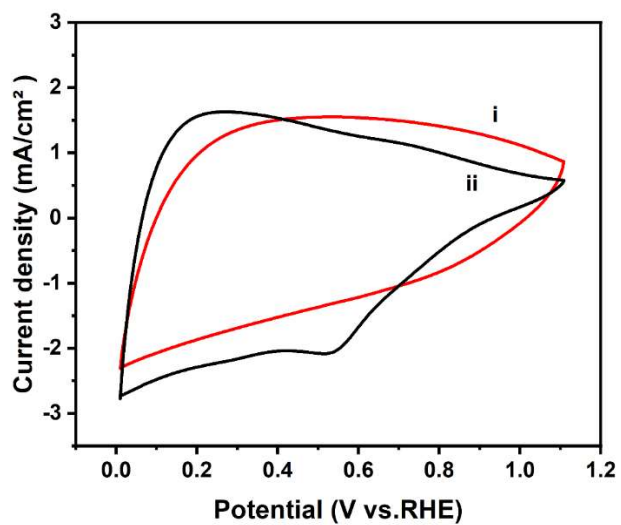

**Fig. S8.** CV curves of N@FCS-900 measured at scan rate of  $10 \text{ mV}\cdot\text{s}^{-1}$  in (i)  $\text{N}_2$ -saturated 0.1M KOH solution, and (ii)  $\text{O}_2$ -saturated 0.1M KOH solution.

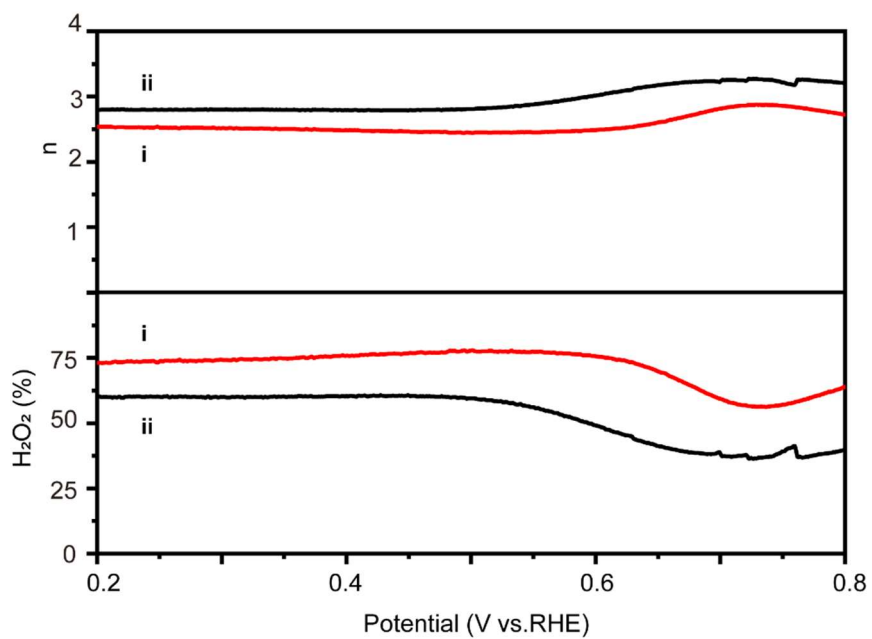

**Fig. S9.** The electron transfer number ( $n$ ) and  $\text{H}_2\text{O}_2\%$  yield of (i)  $\text{C}_{60}$ -900 and (ii)  $\text{N@FCS}$ -900.

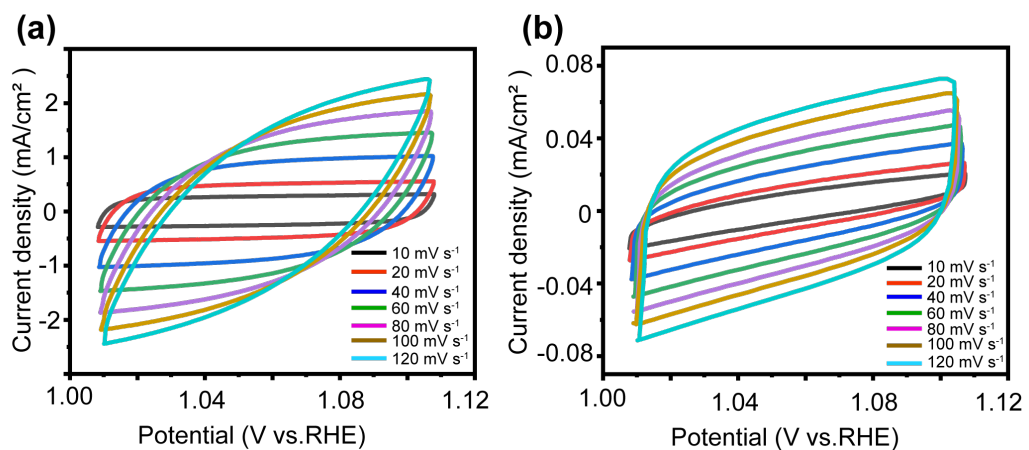

**Fig. S10.** CV curves of (a) FeN@FCS-900 and (b) N@FCS-900 measured in a non-Faradic region at different scan rates.

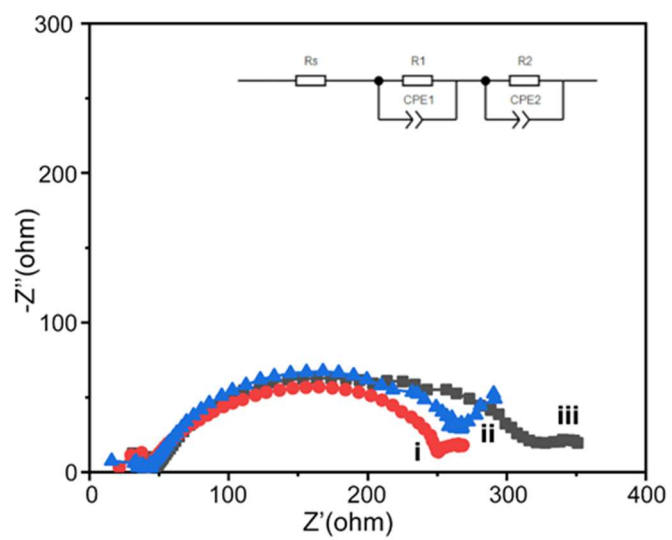

**Fig. S11.** Nyquist plots of (i) FeN@FCS-900, (ii) Pt/C, (iii) N@FCS-900.

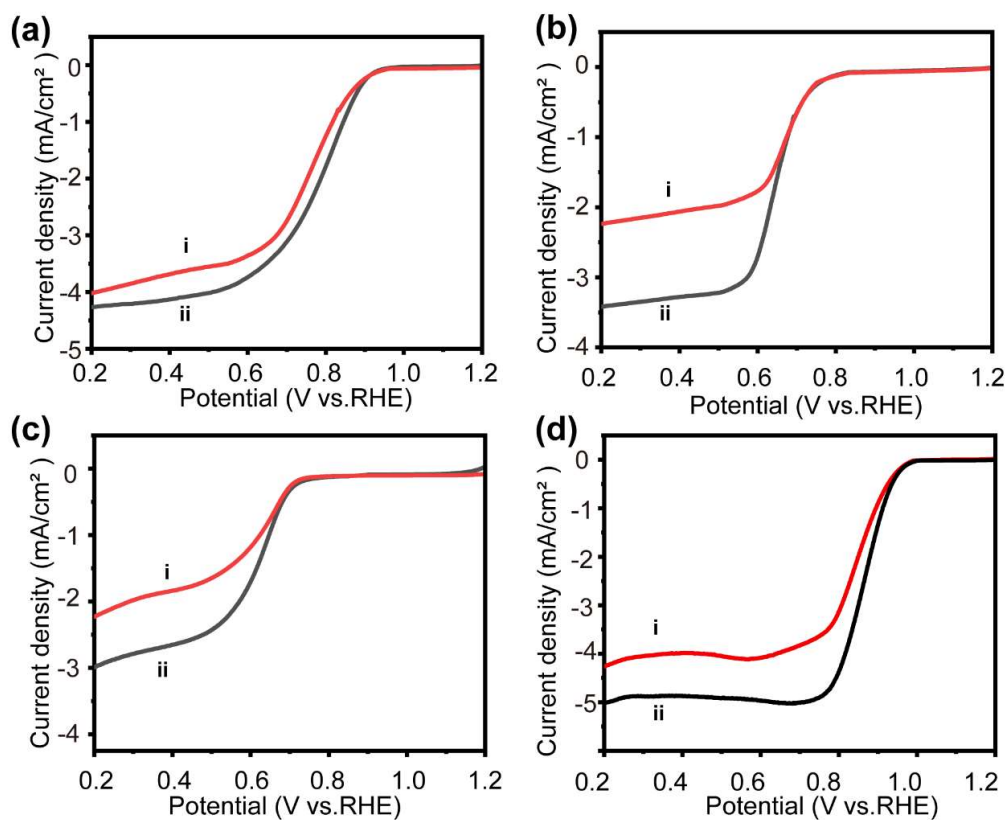

**Fig. S12.** LSV curves of (a) FeN@FCS-900, (b) N@FCS-900, (c) C<sub>60</sub>-900, (d) Pt/C in O<sub>2</sub>-saturated 0.1 M KOH solution at 1600 rpm; (i) before and (ii) after 5000 potential cycles.

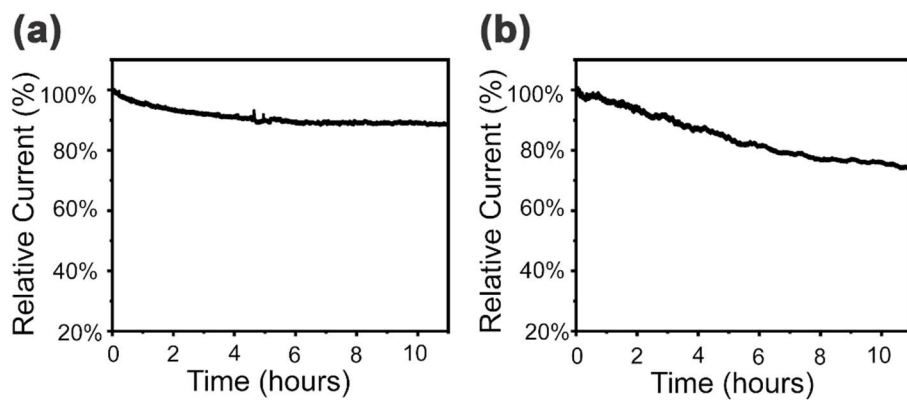

**Fig. S13.** Chronoamperometric response plots of (a) FeN@FCS-900 and (b) Pt/C in  $O_2$ -saturated 0.1M KOH solution.

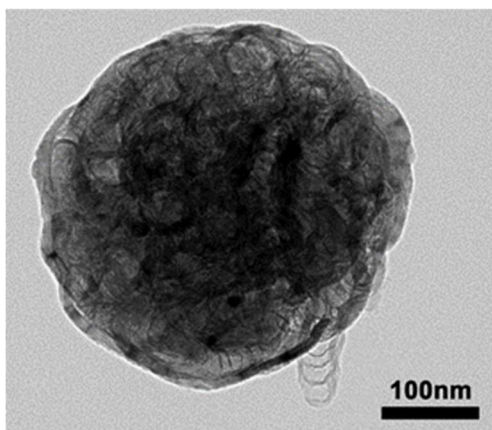

**Fig. S14.** TEM image of FeN@FCS-900 after the ORR process.

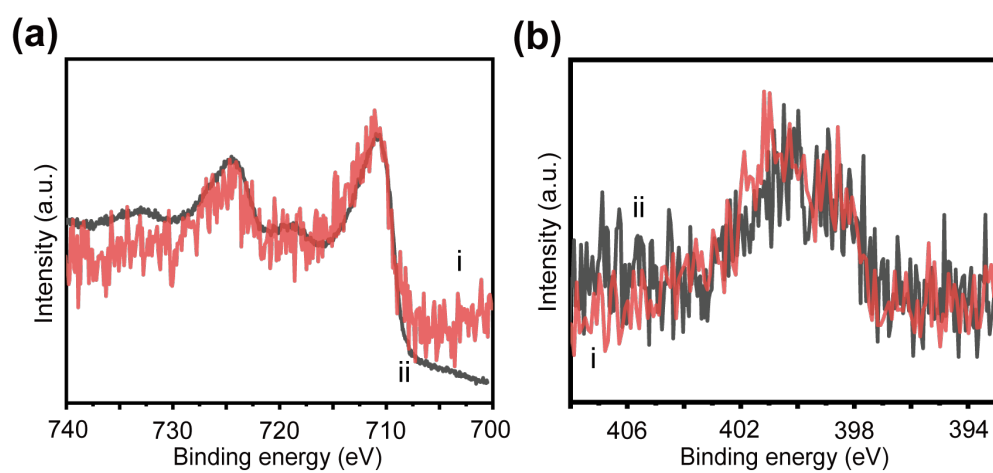

**Fig. S15.** (a) Fe 2p spectra and (b) N 1s spectra of FeN@FCS-900 (i) before and (ii) after the ORR process.



**Table S1.** The comparison of the ORR performance with various reported metal-doped carbon materials.

| Sample name               | $E_{\text{onset}}$ (V) | $E_{1/2}$ (V) | $j_L$ (mA) | Ref.      |
|---------------------------|------------------------|---------------|------------|-----------|
| FeN@FCS-900               | 0.93                   | 0.78          | 4.2        | This work |
| L-FeNC                    | 0.97                   | 0.89          | 5.2        | R1        |
| M15-FeNC-NH <sub>3</sub>  | 0.88                   | 0.78          | 6.14       | R2        |
| SC-Fe                     | 0.96                   | 0.87          | 5.7        | R3        |
| Co@NCNTs                  | 1.01                   | 0.87          | 5.8        | R4        |
| Cu(15%)-MFC <sub>60</sub> | 0.86                   | 0.76          | 5.18       | R5        |
| FMN700                    | 0.93                   | 0.81          | 4.7        | R6        |
| Fe-MFC <sub>60</sub>      | 0.85                   | 0.78          | 3          | R7        |
| N,S-PCNFs                 | 0.96                   | 0.83          | 5.50       | R8        |
| MFC <sub>60</sub> -130    | 0.82                   | 0.76          | 2.7        | R9        |
| MFC <sub>70</sub> -150    | 0.86                   | 0.75          | 5.5        | R10       |
| PD- C <sub>60</sub>       | 0.89                   | 0.78          | 4.8        | R11       |

**Reference in Table S1.**

- R1. X. Jiang, J. Chen, F. Lyu, C. Cheng, Q. Zhong, X. Wang, A. Mahsud, L. Zhang and Q. Zhang, *J. Energy Chem.*, 2021, **59**, 482-491.
- R2. X. Xu, X. Zhang, Z. Xia, R. Sun, H. Li, J. Wang, S. Yu, S. Wang and G. Sun, *J. Energy Chem.*, 2021, **54**, 579-586.
- R3. J. Xie, B. Q. Li, H. J. Peng, Y. W. Song, J. X. Li, Z. W. Zhang and Q. Zhang, *Angew. Chem., Int. Ed.*, 2019, **131**, 5017-5021.
- R4. S. Chao, P. Liu, Q. Xia, S. Liu, W. Chen, W. Li and T. Ni, *CrystEngComm*, 2021, **23**, 1671-1676.

- R5. G. Saianand, A. I. Gopalan, J. C. Lee, C. Sathish, K. Gopalakrishnan, G. E. Unni, D. Shanbhag, V. D. Dasireddy, J. Yi and S. Xi, *Small*, 2020, **16**, 1903937.
- R6. Z. Peng, Q. Jiang, P. Peng and F.-F. Li, *Eng. Sci.*, 2021, **14**, 27-38.
- R7. M. R. Benzigar, S. Joseph, G. Saianand, A.-I. Gopalan, S. Sarkar, S. Srinivasan, D.-H. Park, S. Kim, S. N. Talapaneni and K. Ramadass, *Microporous Mesoporous Mater.*, 2019, **285**, 21-31.
- R8. Z. He, P. Wei, N. Chen, J. Han and X. Lu, *Chem.-Eur. J.*, 2021, **27**, 1423-1429.
- R9. M. R. Benzigar, S. Joseph, H. Ilbeygi, D. H. Park, S. Sarkar, G. Chandra, S. Umamathy, S. Srinivasan, S. N. Talapaneni and A. Vinu, *Angew. Chem., Int. Ed.*, 2018, **57**, 569-573.
- R10. M. R. Benzigar, S. Joseph, A. V. Baskar, D. H. Park, G. Chandra, S. Umamathy, S. N. Talapaneni and A. Vinu, *Adv. Funct. Mater.*, 2018, **28**, 1803701.
- R11. J. Zhu, Y. Huang, W. Mei, C. Zhao, C. Zhang, J. Zhang, I. S. Amiin and S. Mu, *Angew. Chem., Int. Ed.*, 2019, **58**, 3859-3864.
